# Supplementary material for: Hygiene on maternity units: lessons from a needs assessment in Bangladesh and India
Source: PubMed Central journal article supplement (PMC5155114; doi:10.3402/gha.v9.32541), 2016-12-12
Supplement: GHA-9-32541-s001.pdf [file GHA-9-32541-s001.pdf]

**SUPPLEMENTARY MATERIAL: Walkthrough Checklist Results**

**Table 1: Gujarat - Individual facility determinants & outcomes scores by Walkthrough Checklist section**

| Gujarat Determinants Score - n (%) |                 |           |           |            |           |           |           |           |
|------------------------------------|-----------------|-----------|-----------|------------|-----------|-----------|-----------|-----------|
|                                    | Facility Number |           |           |            |           |           |           |           |
| Walkthrough Checklist Section†     | 3               | 4         | 5         | 6          | 7         | 8         | 9         | Average   |
| MW General Area & Handwashing      | 2 (33.3)        | 8 (61.5)  | 8 (61.5)  | 9 (69.2)   | 1 (20.0)  | 1 (20.0)  | 1 (20.0)  | 4 (40.8)  |
| MW Beds                            | 3 (75.0)        | 2 (50.0)  | 3 (60.0)  | 4 (80.0)   | 3 (75.0)  | 3 (60.0)  | 3 (60.0)  | 3 (65.7)  |
| MW Toilets                         | 2 (50.0)        | 4 (57.1)  | 4 (57.1)  | 5 (71.4)   | 1 (25.0)  | 2 (50.0)  | 1 (25.0)  | 3 (51.4)  |
| DU General Area & Handwashing      | 19 (79.2)       | 15 (65.2) | 12 (54.6) | 16 (72.7)  | 14 (73.7) | 10 (47.6) | 13 (59.0) | 14 (64.7) |
| DU Waste Story & Disposal          | 10 (90.0)       | 12 (92.3) | 2 (18.2)  | 2 (20.0)   | 7 (63.6)  | 6 (54.6)  | 5 (50.0)  | 6 (57.1)  |
| Materials & Linen                  | 12 (52.2)       | 12 (52.2) | 10 (43.5) | 21 (91.3)  | 13 (56.5) | 12 (52.2) | 13 (56.5) | 13 (57.8) |
| Gujarat Outcomes Score - n (%)     |                 |           |           |            |           |           |           |           |
|                                    | Facility Number |           |           |            |           |           |           |           |
| Walkthrough Checklist Section      | 3               | 4         | 5         | 6          | 7         | 8         | 9         | Average   |
| MW General Area & Handwashing      | 3 (75.0)        | 5 (45.5)  | 6 (54.6)  | 13 (100.0) | 6 (75.0)  | 0 (0.0)   | 2 (33.3)  | 35 (59.3) |
| MW Beds                            | 3 (42.9)        | 2 (28.6)  | 7 (77.8)  | 9 (100.0)  | 4 (57.1)  | 4 (44.4)  | 4 (44.4)  | 33 (57.9) |
| MW Toilets                         | 1 (25.0)        | 4 (50.0)  | 2 (25.0)  | 7 (87.5)   | 1 (25.0)  | 0 (0.0)   | 1 (25.0)  | 16 (40.0) |
| DU General Area & Handwashing      | 10 (55.6)       | 12 (80.0) | 10 (58.8) | 16 (100.0) | 9 (64.3)  | 8 (50.0)  | 9 (56.3)  | 74 (66.1) |
| DU Waste Story & Disposal          | 2 (100.0)       | 2 (100.0) | 0 (0.0)   | 1 (50.0)   | 1 (50.0)  | 1 (50.0)  | 2 (100.0) | 9 (64.3)  |
| Materials & Linen                  | 3 (50.0)        | 3 (37.5)  | 1 (10.0)  | 8 (100.0)  | 5 (62.5)  | 3 (37.5)  | 3 (37.5)  | 26 (46.4) |

†MW – Maternity Ward; DU – Delivery Unit

**Table 2: Dhaka Division - Individual facility determinants & outcomes scores by Walkthrough Checklist section**

| <b>Dhaka Division Determinants Score - n (%)</b> |                        |           |            |           |            |            |            |           |                |
|--------------------------------------------------|------------------------|-----------|------------|-----------|------------|------------|------------|-----------|----------------|
|                                                  | <b>Facility Number</b> |           |            |           |            |            |            |           |                |
| <b>Walkthrough Checklist Section†</b>            | <b>12</b>              | <b>13</b> | <b>14</b>  | <b>15</b> | <b>16</b>  | <b>17</b>  | <b>18</b>  | <b>19</b> | <b>Average</b> |
| <b>MW General Area &amp; Handwashing</b>         | 8 (66.7)               | 7 (58.3)  | 8 (66.7)   | 1 (8.3)   | 14 (87.5)  | 12 (92.3)  | 12 (92.3)  | 5 (41.7)  | 67 (65.7)      |
| <b>MW Beds</b>                                   | 5 (100.0)              | 4 (80.0)  | 5 (100.0)  | 3 (60.0)  | 4 (80.0)   | 4 (80.0)   | 4 (80.0)   | 3 (75.0)  | 32 (82.1)      |
| <b>MW Toilets</b>                                | 5 (71.4)               | 3 (37.5)  | 4 (57.1)   | 0 (0.0)   | 4 (57.1)   | 5 (71.4)   | 5 (71.4)   | 3 (42.9)  | 29 (50.9)      |
| <b>DU General Area &amp; Handwashing</b>         | 19 (82.6)              | 18 (78.3) | 21 (87.5)  | 12 (52.2) | 24 (100.0) | 22 (91.7)  | 22 (91.7)  | 12 (52.2) | 150 (79.8)     |
| <b>DU Waste Story &amp; Disposal</b>             | 11 (84.6)              | 8 (61.5)  | 13 (100.0) | 2 (15.4)  | 7 (53.9)   | 13 (100.0) | 13 (100.0) | 5 (38.5)  | 72 (69.3)      |
| <b>Cleaning Materials &amp; Linen</b>            | 22 (88.0)              | 14 (56.0) | 21 (84.0)  | 14 (56.0) | 14 (56.0)  | 15 (60.0)  | 18 (72.0)  | 13 (54.2) | 131 (65.8)     |
| <b>Dhaka Division Outcomes Score - n (%)</b>     |                        |           |            |           |            |            |            |           |                |
|                                                  | <b>Facility Number</b> |           |            |           |            |            |            |           |                |
| <b>Walkthrough Checklist Section</b>             | <b>12</b>              | <b>13</b> | <b>14</b>  | <b>15</b> | <b>16</b>  | <b>17</b>  | <b>18</b>  | <b>19</b> | <b>Average</b> |
| <b>MW General Area &amp; Handwashing</b>         | 13 (81.3)              | 6 (46.2)  | 12 (75.0)  | 3 (21.4)  | 9 (56.3)   | 14 (87.5)  | 16 (100.0) | 5 (31.3)  | 78 (63.4)      |
| <b>MW Beds</b>                                   | 9 (100.0)              | 6 (66.7)  | 9 (100.0)  | 5 (55.6)  | 5 (55.6)   | 5 (83.3)   | 6 (100.0)  | 3 (42.9)  | 48 (75.0)      |
| <b>MW Toilets</b>                                | 8 (100.0)              | 0 (0.0)   | 8 (100.0)  | 0 (0.0)   | 3 (37.5)   | 8 (100.0)  | 8 (100.0)  | 0 (0.0)   | 35 (54.7)      |
| <b>DU General Area &amp; Handwashing</b>         | 16 (88.9)              | 14 (77.8) | 17 (94.4)  | 12 (70.6) | 17 (94.4)  | 14 (93.3)  | 15 (100.0) | 8 (47.1)  | 113 (83.1)     |
| <b>DU Waste Story &amp; Disposal</b>             | 2 (100.0)              | 0 (0.0)   | 2 (100.0)  | 0 (0.0)   | 2 (100.0)  | 2 (100.0)  | 2 (100.0)  | 0 (0.0)   | 10 (62.5)      |
| <b>Cleaning Materials &amp; Linen</b>            | 10 (100.0)             | 4 (40.0)  | 10 (100.0) | 4 (40.0)  | 5 (50.0)   | 7 (70.0)   | 7 (100.0)  | 4 (57.1)  | 51 (68.9)      |

†MW – Maternity Ward; DU – Delivery Unit

**Table 3: Gujarat - Facility determinants & outcomes scores grouped according to obstetric functionality† by Walkthrough Checklist section**

| <b>Gujarat Determinants Score - n (%)</b> |                     |                     |                     |
|-------------------------------------------|---------------------|---------------------|---------------------|
| <b>Walkthrough Checklist Section‡</b>     | <b>CEmOC (N, %)</b> | <b>BEmOC (N, %)</b> | <b>Total (N, %)</b> |
| <b>MW General Area &amp; Handwashing</b>  | 29 (52.7)           | 1 (20.0)            | 30 (50.0)           |
| <b>MW Beds</b>                            | 18 (66.7)           | 3 (60.0)            | 21 (65.6)           |
| <b>MW Toilets</b>                         | 18 (54.6)           | 1 (25.0)            | 19 (51.4)           |
| <b>DU General Area &amp; Handwashing</b>  | 86 (65.6)           | 13 (59.1)           | 99 (64.7)           |
| <b>DU Waste Story &amp; Disposal</b>      | 39 (58.2)           | 5 (50.0)            | 44 (57.1)           |
| <b>Materials &amp; Linen</b>              | 80 (58.0)           | 13 (56.5)           | 93 (57.8)           |
| <b>Gujarat Outcomes Score - n (%)</b>     |                     |                     |                     |
| <b>Walkthrough Checklist Section</b>      | <b>CEmOC (N, %)</b> | <b>BEmOC (N, %)</b> | <b>Total (N, %)</b> |
| <b>MW General Area &amp; Handwashing</b>  | 33 (62.3)           | 2 (33.3)            | 35 (59.3)           |
| <b>MW Beds</b>                            | 29 (60.4)           | 4 (44.4)            | 33 (57.9)           |
| <b>MW Toilets</b>                         | 15 (41.7)           | 1 (25.0)            | 16 (40.0)           |
| <b>DU General Area &amp; Handwashing</b>  | 65 (67.7)           | 9 (56.3)            | 74 (66.1)           |
| <b>DU Waste Story &amp; Disposal</b>      | 7 (58.3)            | 2 (100.0)           | 9 (64.3)            |
| <b>Materials &amp; Linen</b>              | 23 (47.9)           | 3 (37.5)            | 26 (46.4)           |

† Comprehensive Emergency Obstetric Care (CEmOC)/Basic Emergency Obstetric Care (BEmOC)

‡DU – Delivery Unit; MW – Maternity Ward

**Table 4: Dhaka Division - Facility determinants & outcomes scores grouped according to obstetric functionality† by Walkthrough Checklist section**

| <b>Dhaka Division Determinants Score - n (%)</b> |                     |                     |                     |
|--------------------------------------------------|---------------------|---------------------|---------------------|
| <b>Walkthrough Checklist Section‡</b>            | <b>CEmOC (N, %)</b> | <b>BEmOC (N, %)</b> | <b>Total (N, %)</b> |
| <b>MW General Area &amp; Handwashing</b>         | 38 (59.4)           | 29 (76.3)           | 67 (65.7)           |
| <b>MW Beds</b>                                   | 21 (84.0)           | 11 (78.6)           | 32 (82.1)           |
| <b>MW Toilets</b>                                | 16 (44.4)           | 13 (61.9)           | 29 (50.9)           |
| <b>DU General Area &amp; Handwashing</b>         | 94 (80.3)           | 56 (78.9)           | 150 (79.8)          |
| <b>DU Waste Story &amp; Disposal</b>             | 41 (63.1)           | 5 (50.0)            | 72 (69.2)           |
| <b>Cleaning Materials &amp; Linen</b>            | 85 (68.0)           | 46 (62.2)           | 131 (65.8)          |
| <b>Dhaka Division Outcomes Score - n (%)</b>     |                     |                     |                     |
| <b>Walkthrough Checklist Section</b>             | <b>CEmOC (N, %)</b> | <b>BEmOC (N, %)</b> | <b>Total (N, %)</b> |
| <b>MW General Area &amp; Handwashing</b>         | 43 (57.3)           | 35 (72.9)           | 78 (63.4)           |
| <b>MW Beds</b>                                   | 34 (75.6)           | 14 (73.7)           | 48(75.0)            |
| <b>MW Toilets</b>                                | 19 (47.5)           | 16 (66.7)           | 35 (54.7)           |
| <b>DU General Area &amp; Handwashing</b>         | 76 (85.4)           | 37 (78.7)           | 113 (83.1)          |
| <b>DU Waste Story &amp; Disposal</b>             | 6 (60.0)            | 4 (66.7)            | 10 (62.5)           |
| <b>Cleaning Materials &amp; Linen</b>            | 33 (66.0)           | 18 (75.0)           | 51 (68.9)           |

† Comprehensive Emergency Obstetric Care (CEmOC)/Basic Emergency Obstetric Care (BEmOC)

‡DU – Delivery Unit; MW – Maternity Ward
